# Supplementary material for: Role of claudin species–specific dynamics in reconstitution and remodeling of the zonula occludens
Source: PubMed Central journal article supplement — Mol Biol Cell. 2011 May 1;22(9):1495–504. doi: 10.1091/mbc.E10-12-1003 (PMC3084672; doi:10.1091/mbc.e10-12-1003), 2011-05-01
Supplement: E10-12-1003_1.pdf [file E10-12-1003_1.pdf]

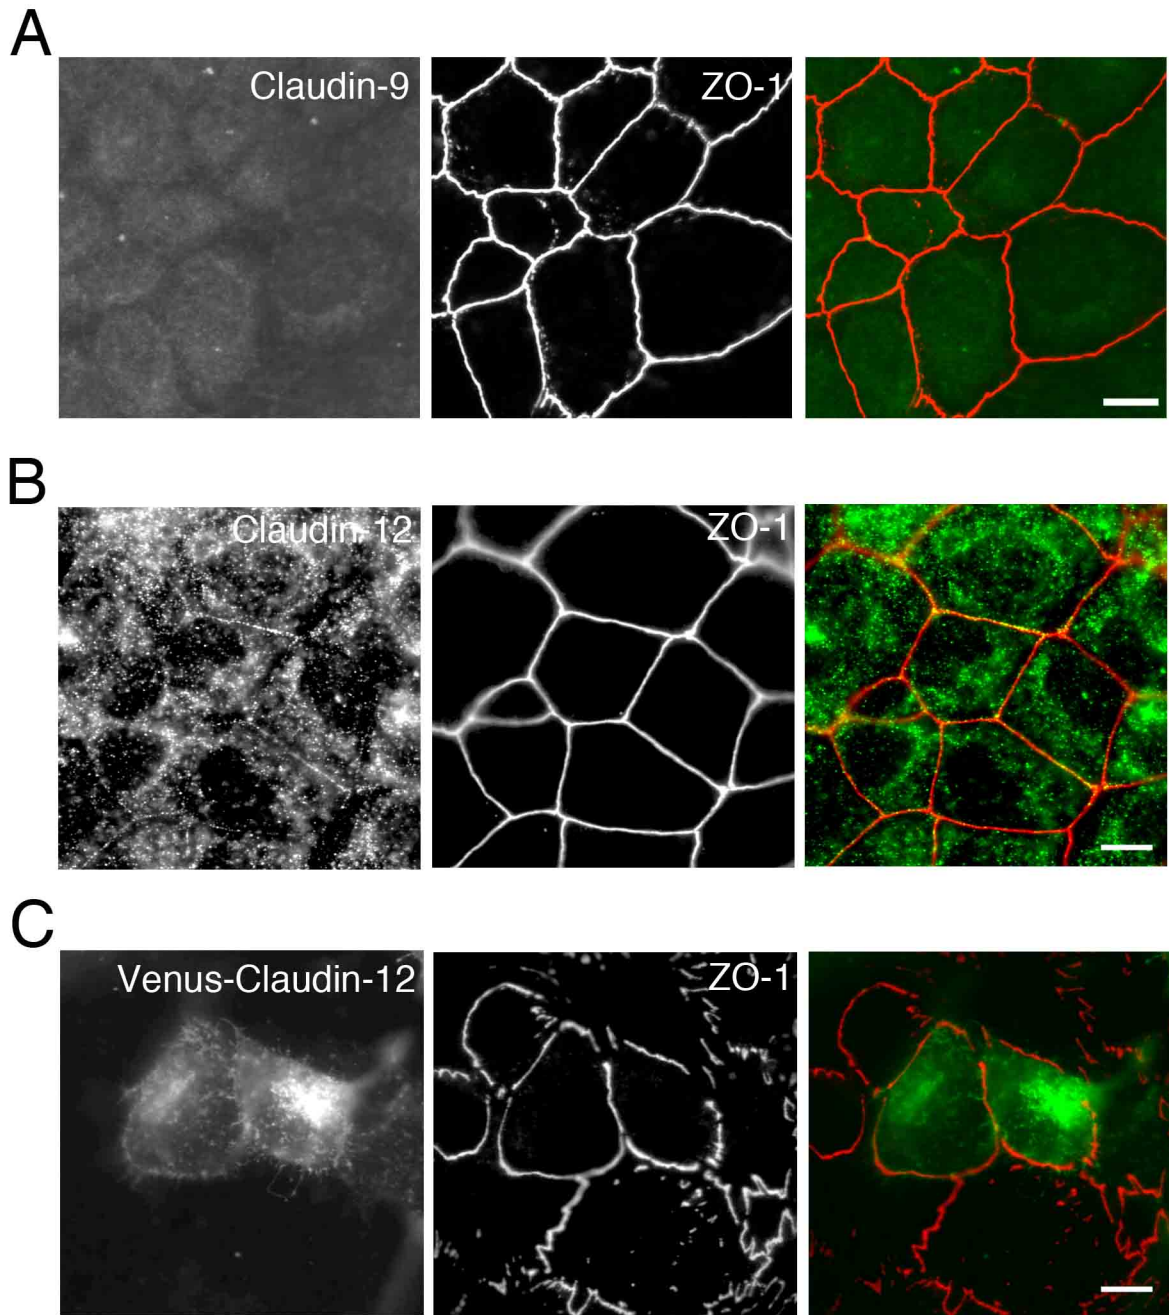

*Supplementary Figure S1 Yamazaki et al.*

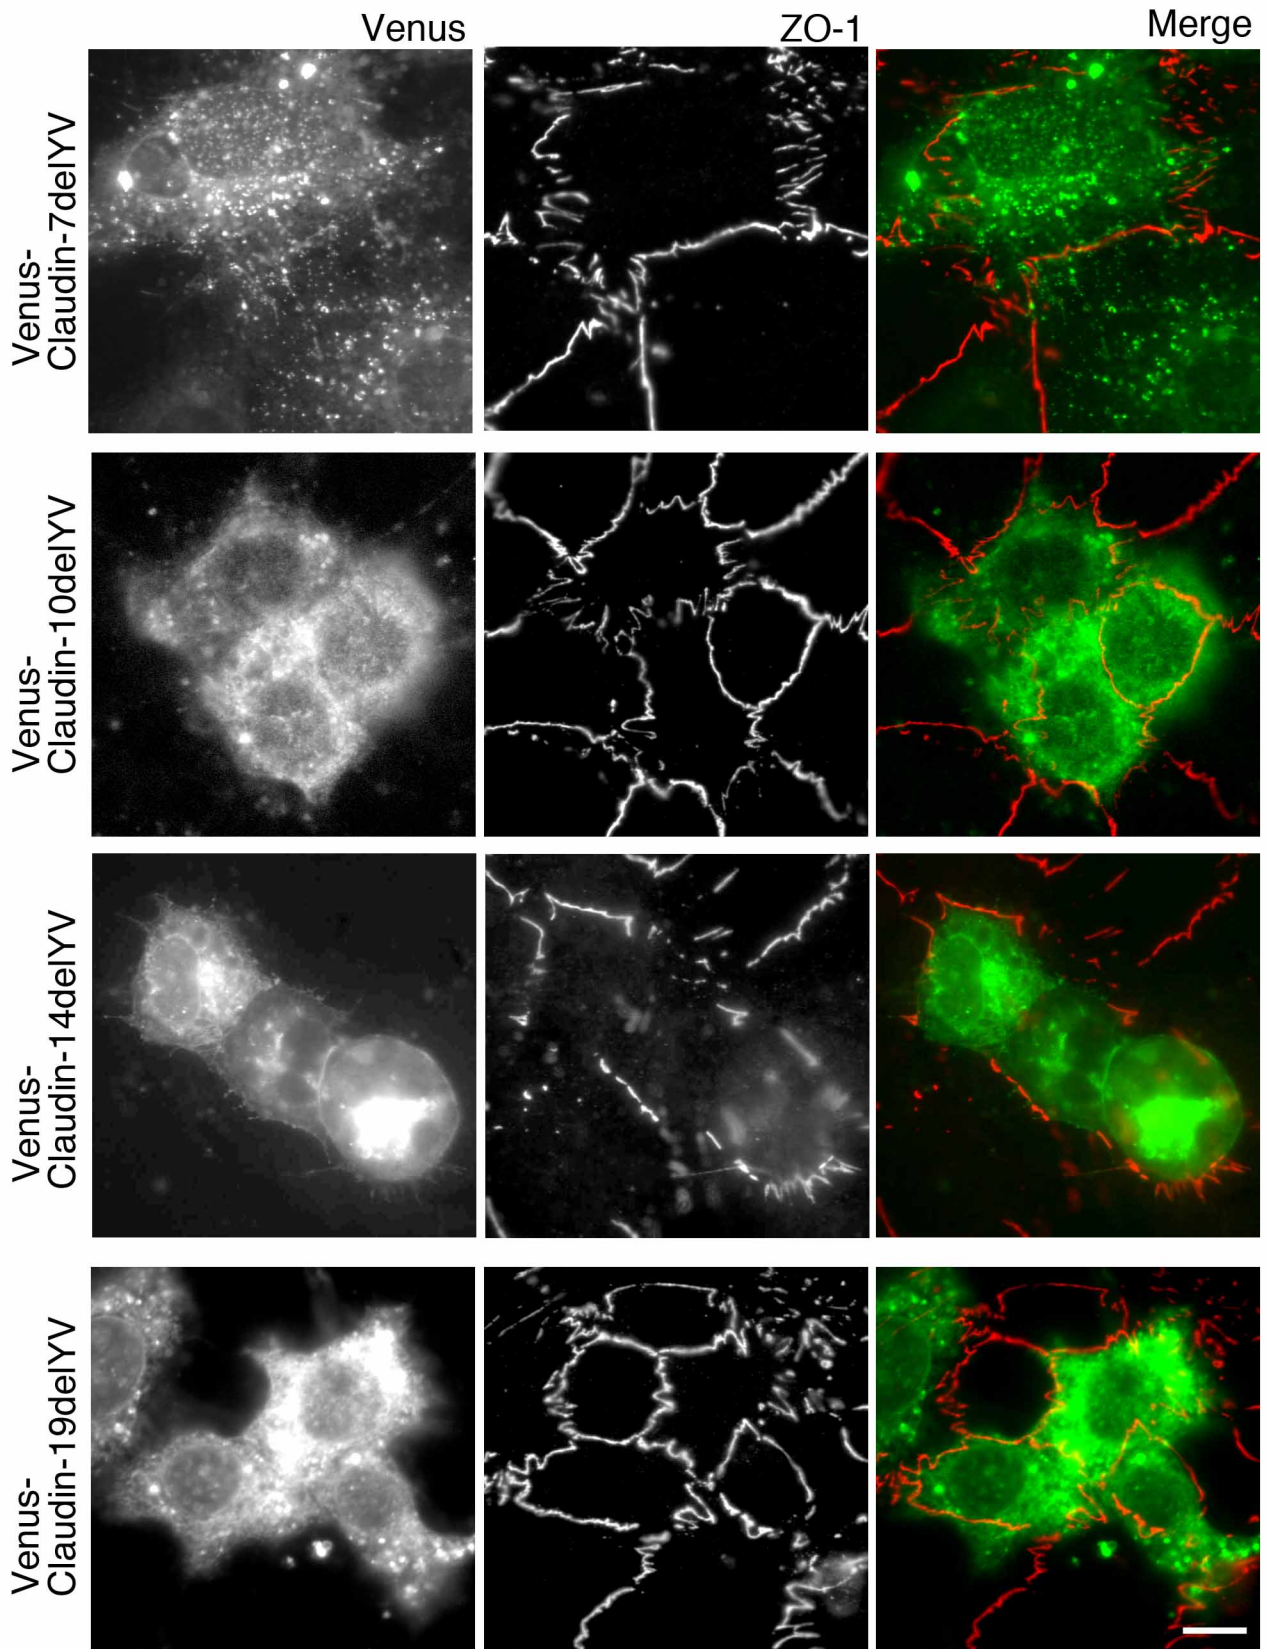

Supplementary Figure S2 Yamazaki et al.

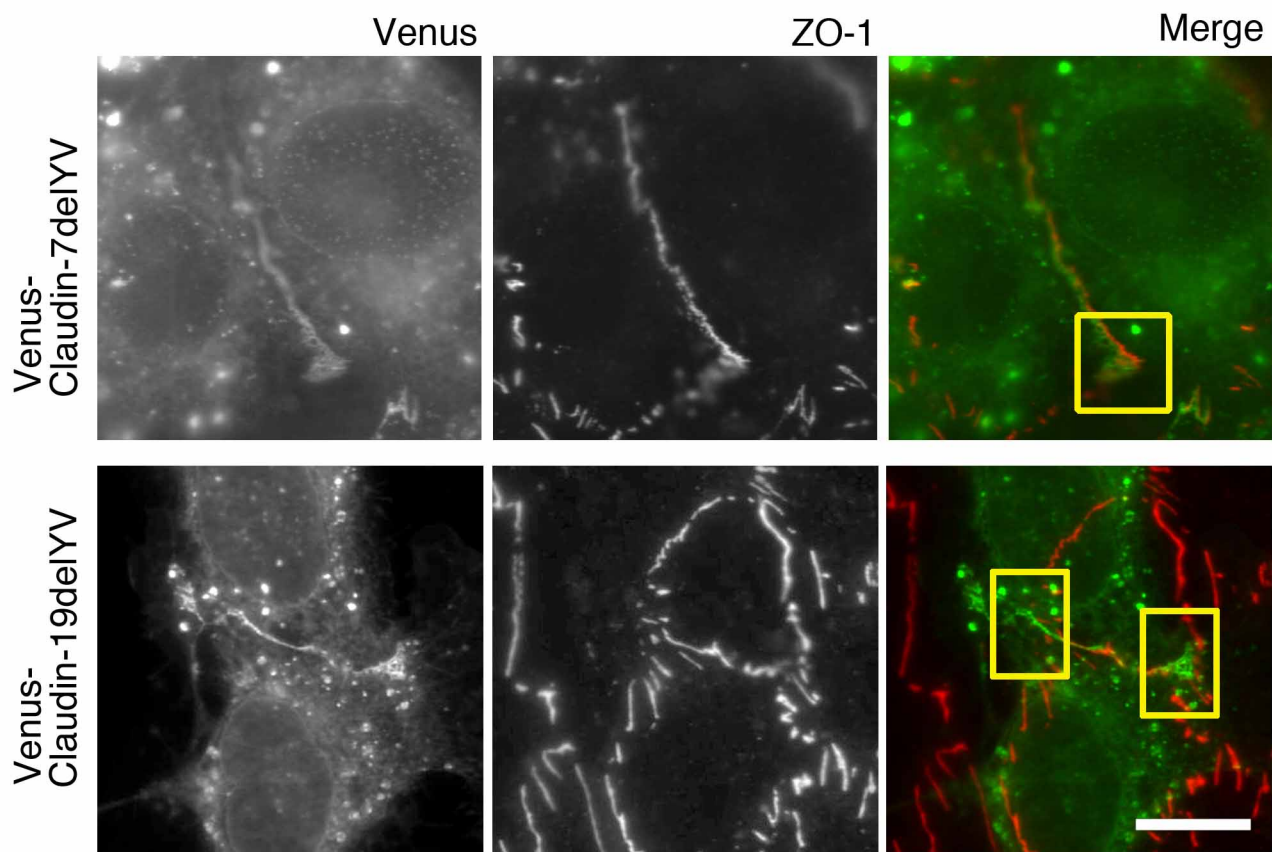

Supplementary Figure S3 Yamazaki et al.

# Realtime RT-PCR of Eph4 cells

Relative ratio vs GAPDH

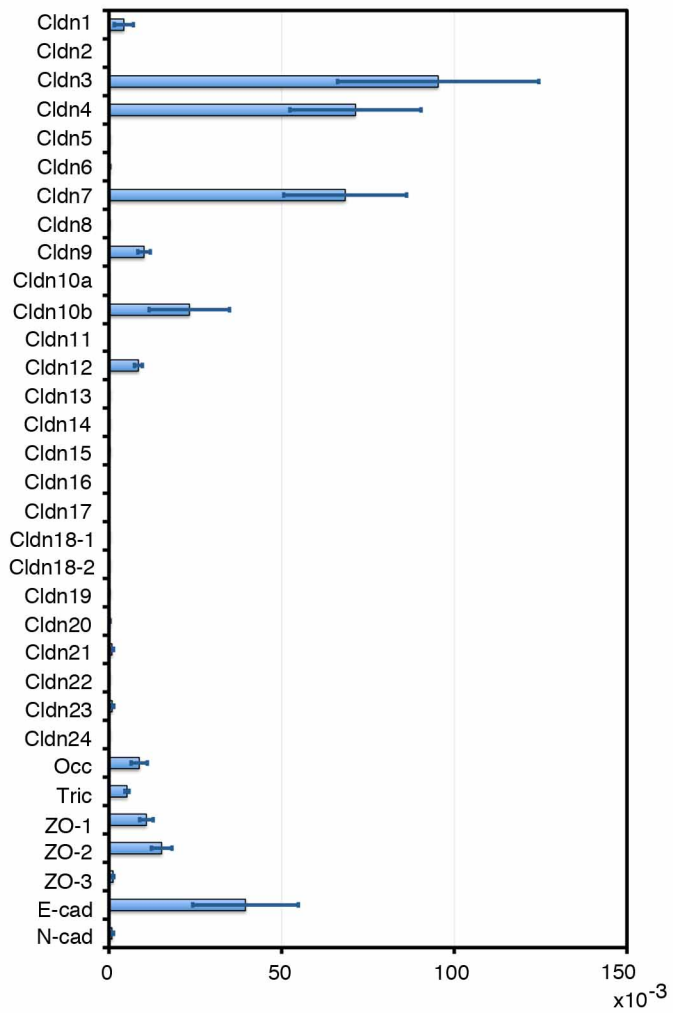

Supplementary Figure S4 Yamazaki et al.

## Microarray analysis of claudins, occludin, and tricellulin in SF7cells

| Probe Name   | Signal | Detection | p-value  | Gene        |
|--------------|--------|-----------|----------|-------------|
| 1437932_a_at | 2.6    | A         | 0.718506 | claudin 1   |
| 1438850_at   | 5      | A         | 0.457764 | claudin 1   |
| 1417231_at   | 76.2   | A         | 0.219482 | claudin 2   |
| 1417232_at   | 47.2   | A         | 0.334473 | claudin 2   |
| 1426332_a_at | 19     | A         | 0.828613 | claudin 3   |
| 1434651_a_at | 8.4    | A         | 0.601074 | claudin 3   |
| 1418283_at   | 52.5   | A         | 0.601074 | claudin 4   |
| 1417839_at   | 32.9   | A         | 0.171387 | claudin 5   |
| 1417845_at   | 18.8   | A         | 0.533936 | claudin 6   |
| 1448393_at   | 10.7   | A         | 0.303711 | claudin 7   |
| 1449091_at   | 0.9    | A         | 0.753906 | claudin 8   |
| 1450524_at   | 4.6    | A         | 0.72583  | claudin 9   |
| 1439427_at   | 48.2   | P         | 0.001221 | claudin 9   |
| 1426147_s_at | 52.1   | A         | 0.171387 | claudin 10  |
| 1416003_at   | 4.2    | A         | 0.432373 | claudin 11  |
| 1433781_a_at | 6573   | P         | 0.000244 | claudin 12  |
| 1433782_at   | 2217.6 | P         | 0.000244 | claudin 12  |
| 1422920_at   | 35.6   | A         | 0.219482 | claudin 13  |
| 1420345_at   | 3.1    | A         | 0.533936 | claudin 14  |
| 1418920_at   | 52.1   | A         | 0.067627 | claudin 15  |
| 1420434_at   | 5.8    | A         | 0.753906 | claudin 16  |
| 1425445_a_at | 53     | A         | 0.149658 | claudin 18  |
| 1449428_at   | 5.3    | A         | 0.633789 | claudin 18  |
| 1425727_at   | 32     | A         | 0.45752  | claudin 19  |
| 1430237_at   | 95.9   | A         | 0.095215 | claudin 22  |
| 1424409_at   | 2.3    | A         | 0.870361 | claudin 23  |
| 1425191_at   | 386.5  | P         | 0.000244 | occludin    |
| 1448873_at   | 158.2  | P         | 0.000244 | occludin    |
| 1426914_at   | 3.8    | A         | 0.80542  | tricellulin |

## Primers designed for Real-time PCR

| name of gene | Sequence (5' → 3')              |                                |
|--------------|---------------------------------|--------------------------------|
|              | Forward                         | Reverse                        |
| Cldn1        | CTGGAAGATGATGAGGTGCAGAAGA       | CCACTAATGTCGCCAGACCTGAA        |
| Cldn2        | ATACTACCCTTTAGCCCTGACCGAGA      | CAGTAGGAGCACACATAACAGCTACCAC   |
| Cldn3        | CAGTGTACCAACTGCGTACAAGAC        | ACCGGTACTAAGGTGAGCAGAG         |
| Cldn4        | GGTAGCTCAGCTGTGACTTTGGACTC      | CTGGAGTAACGTGTAGGCTGAGTGAG     |
| Cldn5        | TAACCTGAAAGGGCAGCTGGAGAAAC      | AGGTCCAGGCTAAGTCCTTTGGTTCAGTAG |
| Cldn6        | TGCCCACTCTATCATCCAGGACTTC       | AGGCCTGAGGCTGCCAG              |
| Cldn7        | ACGCCCATGAACGTTAAGTACGAG        | CTTTGCTTTCACTGCCTGGACA         |
| Cldn8        | CTGGGGATAAAAGAGAAGGAGGCTGA      | AGGCTGCAAAGCAGGATAGCAGAAAG     |
| Cldn9        | CTTGAGCTAACCCCTCTGTAGTGGTTG     | CCAGAGTAAGAAAGTCCAGGAGAGCA     |
| Cldn10a      | TCCCACACTTCAAGCCATGAGA          | GCAGACACTGGACAAAACCTTCCAC      |
| Cldn10b      | TGGGTGCTAGTGTCTTCCACACTG        | GAATCGGTAACGCAGATCTTCCAC       |
| Cldn11       | CTGCCGAAAAATGGACGAACTG          | TGCACGTAGCCTGGAAGGATGA         |
| Cldn12       | CAGACCAGTGTGTACTCAGACTTTCTACCC  | GAAGCAACATACTGACTGTCTCCTGACG   |
| Cldn13       | GTCAACATCCAGTATGCAGAGACTTTC     | GCTGGCCATCAAACATCTAAGGTATC     |
| Cldn14       | GCAGCGTTGATAGCTGAAACTAGGTG      | CCAAGGCTGCTAGAACTTTGCTG        |
| Cldn15       | GCAGGGACCCTCCACATACTTG          | AGTTCATACTTGGTTCCAGCATAACAGTG  |
| Cldn16       | CTGGAGGTGAGCACTAAATGCAGAG       | AGTTACCACCAGCTTCAAGGGATGTTC    |
| Cldn17       | CTTCCACCAGCTACGTCTAAGGCTTACTTC  | CTGAAGTACTCACAGTTTCTGGGGTGAC   |
| Cldn18-1     | AGTATGAAGGGCTCTGGAGGAGTTG       | AGAACAATGCCACGATCATCAG         |
| Cldn18-2     | GTATTCAACTACCAAGGGCTATGGCGTTC   | ATCATCAGGGCTCGTACAGCTTGC       |
| Cldn19       | CAGGTCTCTGTACTTTGACTGCTGTCTC    | CCAAATTCGTACCTGGCATTGAC        |
| Cldn20       | GGTACACCAAGGAGATCATAGCGAAC      | ATGTACAGGGCTCCTCCAGGTTCCATA    |
| Cldn21       | CCTGCAGCCTCGAGTCACTATG          | CTTTAGGCTGTACAGTTCCATTTTCTAGG  |
| Cldn22       | CTCCCAGAACGTTCTAATGGGCTTAG      | AGTGCGGCAAGTAGTTTGTAAAGGCAG    |
| Cldn23       | TGGAGTCTGAGGGTGACTTGAACCTCTG    | AAGGAAGGCTTGACCTCCAGTTAGAGGAAG |
| Cldn24       | ACTCTGGAAGCATCAGCTTCCAGCTACTACC | GGATGCTGTTCATCCAGAAGTCTTGA     |
| Occludin     | GGACCCTGACCACTATGAAACAGACTAC    | ATAGGTGGATATTCCCTGACCCAGTC     |
| Tricellulin  | GCAGGCTCCCACATCATTCTG           | TTGAGGTAATCGCAACGCTCC          |
| ZO-1         | AGCTCATAGTTCAACACAGCCTCCAG      | TTCTTCCACAGCTGAAGGACTCACAG     |
| ZO-2         | GGAGACCAGATTCTGAAGGTGAACACAC    | ACCTTTGGGGATTTCTAGCAGGTAGAGGAC |
| ZO-3         | GGATGAGATCTTGCAGGTGAATGG        | TCCTGTTTGCTCTGTGTTACCAGCTC     |
| E-cadherin   | AGGAAATGCACCCCTCCAAT            | AATCGGCCAGCATTTTCTG            |
| N-cadherin   | GGTGGAGGAGAAGAAGACCAG           | GGCATCAGGCTCCACAGT             |

## **Supplementary Figure Legends**

### **Supplementary Figure S1**

Immunofluorescence micrographs of claudins in SF7 cells. A) Immunofluorescent detection of endogenous claudins in SF7 cells. Claudin-9 was not detected, although it showed a positive signal in the microarray analysis. Green: claudin-9, Red: ZO-1, Bar: 10  $\mu\text{m}$ . B) Immunofluorescence micrographs of claudin-12. The staining for claudin-12 showed a dotted pattern at cell-cell contacts, but most of it did not coincide with ZO-1 staining. Green: claudin-12 Red: ZO-1, Bar: 10  $\mu\text{m}$ . C) Immunofluorescence micrographs of the transient expression of Venus-claudin-12 in SF7 cells. Only a small amount of the Venus-claudin-12 overlapped with the ZO-1 staining; most of it was distributed over the whole plasma membrane. Green: Venus, Red: ZO-1, Bar: 10  $\mu\text{m}$ .

### **Supplementary Figure S2**

Immunofluorescence micrographs of Venus-tagged claudin mutants in which the ZO-1/2-binding regions were deleted, in SF7 cells. The claudin-7, -10, -14, and -19 mutants did not co-localize with ZO-1. Green: Venus, Red: ZO-1, Bar: 10  $\mu\text{m}$ .

### **Supplementary Figure S3**

Immunofluorescence micrographs of Venus-tagged claudin mutants in which the ZO-1/2-binding regions were deleted, in SF7 cells. Note that the mutants of claudin-7 and -19 appeared to polymerize independently of ZO-1. Yellow boxes indicate regions of claudin polymerization. Green: Venus, Red: ZO-1, Bar, 10  $\mu\text{m}$ .

**Supplementary Figure S4**

Real-time RT-PCR of claudins, other tight-junction proteins, and adherens-junction proteins in Eph4 cells. Various claudin species were detected at the transcriptional level. The expression levels relative to that of GAPDH are shown.

**Supplementary Table S1 Microarray analysis of claudin expression in SF7 cells.**

Among the twenty-four claudin members, signals for claudin-9 and claudin-12 were detected. The signal for occludin was also positive. Note that only one of two probes against claudin-9 could detect a signal, suggesting that the claudin-9 expression was low.

**Supplementary Table S2 Primers for real-time RT-PCR**

The primers for real-time RT-PCR are listed.
